# Supplementary material
Source: PubMed Central journal article supplement (PMC9385346)
Supplement: mmc3.pdf [file mmc3.pdf]

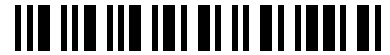

## Section A: COVID-19 related Plastic Waste Survey

This questionnaire is sent to you as a part of the research on "Identify the impact of the COVID related plastic waste in Sri Lanka". It is requested that you answer the questionnaire in accordance with the following instructions. Your cooperation with the survey would be greatly appreciated.

**A1. Age**

|  |  |  |  |  |  |  |  |  |  |
|--|--|--|--|--|--|--|--|--|--|
|  |  |  |  |  |  |  |  |  |  |
|--|--|--|--|--|--|--|--|--|--|

**A2. Gender**

Female

Male

**A3. The district that you live in (Sri Lanka\*)?**

Ampara

Anuradhapura

Badulla

Batticaloa

Colombo

Galle

Gampaha

Hambantota

Jaffna

Kalutara

Kandy

Kegalle

Kilinochchi

Kurunegala

Mannar

Matale

Matara

Monaragala

Mullaitivu

Nuwara Eliya

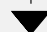

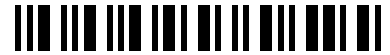

Polonnaruwa

Puttalam

Ratnapura

Trincomalee

Vavuniya

**A4. Which of the following best describes the area you live in?**

Urban

Sub-urban

Rural

**A5. What is your level of Income?**

Below Rs.20,000/=

Rs.20,001/= to Rs.60,000/=

Rs.60,001/= to Rs.100,000/=

Above Rs.100,000/=

Prefer not to say

**A6. How many members in your household unit?**

1

2

3

4

5

6

7

8

More than 8

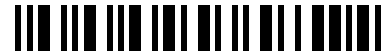

**A7. What is your current employment status?**

- Employed –Full time
- Employed –Part Time
- Self-employed
- Unemployed
- Student
- Retired

**A8. Highest educational qualification**

- Uneducated
- Elementary
- Secondary
- Bachelor Degree
- Post Graduate

**A9. Which single-use plastic products you use the most?**

*(Note: Single-use plastics, or disposable plastics, are used only once before they are thrown away or recycled)*

*Please leave other products you don't use, and rank the most used methods*

- Grocery bags
- Plastic Bottles
- Plastic Straws
- Plastic Cotton Buds
- Coffee Cups & Lids
- Food packaging containers

**A10. Which COVID Related single-use plastic products you use the most?**

*Please leave other products you don't use, and rank the most used methods*

- Disposable face masks
- Face shields
- Gloves
- Hand sanitizer products

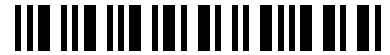

**A11. In your opinion what impact does plastic pollution have on the following?**

*Please tick the most appropriate answer*

|                                | No impact                | Low impact               | Moderate impact          | High impact              | Extremely high impact    |
|--------------------------------|--------------------------|--------------------------|--------------------------|--------------------------|--------------------------|
| Natural Environment- Waterways | <input type="checkbox"/> |
| Natural Environment- Land      | <input type="checkbox"/> |
| Urban Environment              | <input type="checkbox"/> |
| Agriculture industry           | <input type="checkbox"/> |
| Fisheries Industry             | <input type="checkbox"/> |
| Tourism industry               | <input type="checkbox"/> |
| Human health                   | <input type="checkbox"/> |

**A12. In your opinion, how did the Covid-19 affect the usage of single-use plastic products in your household?**

*Please tick the most appropriate answer*

| Decrease greatly         | Decrease slightly        | Stay the same            | Increase slightly        | Increase greatly         |
|--------------------------|--------------------------|--------------------------|--------------------------|--------------------------|
| <input type="checkbox"/> |

**A13. What are the main reasons for using single-use plastic based materials?**

*Please rank according to your choice*

|                               |                          |
|-------------------------------|--------------------------|
| Low price                     | <input type="checkbox"/> |
| Easy availability             | <input type="checkbox"/> |
| Light weight                  | <input type="checkbox"/> |
| Lack of alternative materials | <input type="checkbox"/> |

**A14. Who do you think is responsible for dealing with plastic pollution?**

*For each section, please tick the most appropriate answer*

|                   | Strongly disagree        | Disagree                 | Neither disagree or agree | Agree                    | Strongly agree           |
|-------------------|--------------------------|--------------------------|---------------------------|--------------------------|--------------------------|
| Consumers         | <input type="checkbox"/> | <input type="checkbox"/> | <input type="checkbox"/>  | <input type="checkbox"/> | <input type="checkbox"/> |
| Producers         | <input type="checkbox"/> | <input type="checkbox"/> | <input type="checkbox"/>  | <input type="checkbox"/> | <input type="checkbox"/> |
| Local Authorities | <input type="checkbox"/> | <input type="checkbox"/> | <input type="checkbox"/>  | <input type="checkbox"/> | <input type="checkbox"/> |
| Government        | <input type="checkbox"/> | <input type="checkbox"/> | <input type="checkbox"/>  | <input type="checkbox"/> | <input type="checkbox"/> |

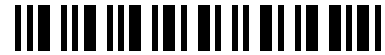

**A15. Please rank your waste disposal methods for single-use plastic waste BEFORE Covid-19?**

*Please leave other methods you don't use, and rank the most used methods*

- Burning
- Open dumping
- Burying
- Recycling
- Handover to collection

**A16. Please rank your waste disposal methods for single-use plastic waste AFTER Covid-19?**

*Please leave other methods you don't use, and rank the most used methods*

- Burning
- Open Dumping
- Burying
- Recycling
- Hand over to collection

**A17. Have you noticed a change in the amount of plastic waste in the environment where you live since Covid-19?**

- More than usual
- Same as before
- Less than usual
- Do not know

**A18. How satisfied are you with the level of action taken by the local authorities (eg. Municipal Councils/ Urban Councils/ Pradeshiya Sabha) to tackle plastic pollution?**

- Very Satisfied   Satisfied   Neutral   Dissatisfied   Very dissatisfied
- .....  .....  .....  .....

**A19. Have you received any information about how to manage or dispose of your Covid related plastic waste during Covid-19?**

- Yes
- No

**A20. Where did you hear about it?**

- Central Environmental Authority

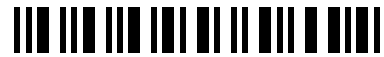

Local authorities (Municipal Councils, Urban councils, Pradeshiya Sabha)

Media (TV, Radio, Newspaper, Leaflets)

Friends, families or neighbors

Employer

Other

Other

Grid for writing other sources: 20 columns by 1 row.

**A21. Do you have enough information being provided by the local authorities /government about how and what types of plastic waste you can reuse, and recycle?**

Happy with the amount of information

Require more information

Not aware it was available

No information available

**A22. "The Government of Sri Lanka banned any polythene product under 20 microns in thickness (Thin polythene bags) for in-country use."**

**What is your opinion about this statement prior to the Covid-19 ?**

*Please tick the most appropriate answer*

Strongly against  ..... Against  ..... Neutral  ..... Agreed  ..... Strongly agreed

**A23. "The Government of Sri Lanka banned any polythene product under 20 microns in thickness (Thin polythene bags) for in-country use."**

**What is your opinion about this statement after the Covid-19?**

*Please tick the most appropriate answer*

Strongly against  ..... Against  ..... Neutral  ..... Agreed  ..... Strongly agreed

**A24. If a recycling program was set up, would you be willing to segregate and store your plastic waste?**

Yes

No

**A25. If No, Please Specify;**

Lack of space

Viewed as unclean

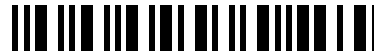

Not convenient

Other

Other

Grid for text entry: 14 columns by 1 row

**A26. If a plastic collection center was located in your community, What mode would you be willing to choose to travel?**

*Please select any methods that are accessible to yourself*

- Walk
- Motorbike
- Three wheeler
- Car
- Household collection

**A27. How long will you be willing to walk?**

|                          |                           |                            |                          |                            |
|--------------------------|---------------------------|----------------------------|--------------------------|----------------------------|
| Less than<br>5 minutes   | Around<br>5-10<br>minutes | Around<br>10-15<br>minutes | 15-30<br>minutes         | More than<br>30<br>minutes |
| <input type="checkbox"/> | <input type="checkbox"/>  | <input type="checkbox"/>   | <input type="checkbox"/> | <input type="checkbox"/>   |

**A28. How long will you be ride motorbike?**

|                          |                           |                            |                          |                            |
|--------------------------|---------------------------|----------------------------|--------------------------|----------------------------|
| Less than<br>5 minutes   | Around<br>5-10<br>minutes | Around<br>10-15<br>minutes | 15-30<br>minutes         | More than<br>30<br>minutes |
| <input type="checkbox"/> | <input type="checkbox"/>  | <input type="checkbox"/>   | <input type="checkbox"/> | <input type="checkbox"/>   |

**A29. How long will you be drive from a three wheeler?**

|                          |                           |                            |                          |                            |
|--------------------------|---------------------------|----------------------------|--------------------------|----------------------------|
| Less than<br>5 minutes   | Around<br>5-10<br>minutes | Around<br>10-15<br>minutes | 15-30<br>minutes         | More than<br>30<br>minutes |
| <input type="checkbox"/> | <input type="checkbox"/>  | <input type="checkbox"/>   | <input type="checkbox"/> | <input type="checkbox"/>   |

**A30. how long will you be drive from your car?**

|                          |                           |                            |                          |                            |
|--------------------------|---------------------------|----------------------------|--------------------------|----------------------------|
| Less than<br>5 minutes   | Around<br>5-10<br>minutes | Around<br>10-15<br>minutes | 15-30<br>minutes         | More than<br>30<br>minutes |
| <input type="checkbox"/> | <input type="checkbox"/>  | <input type="checkbox"/>   | <input type="checkbox"/> | <input type="checkbox"/>   |

**A31. Would you be willing to pay for the pickup of these recycling materials from your home?**

- Yes
- No
- Maybe

**A32. If Yes, How much would you be willing to pay for your pickup per month in rupees?**

Grid for text entry: 14 columns by 1 row

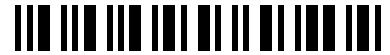

**A33. Would you be willing to purchase your items in multi-use containers (such as glass bottles, metal containers, reusable plastic containers) to help reduce the amount of plastic waste?**

Yes

No

May be

**A34. If yes, would you purchase if they were slightly more expensive?**

Yes

No

Maybe

**A35. Would you be more willing to use a products, if it contained recycled old plastics?**

Yes

No

Maybe
